# Supplementary material for: Development of a PCR algorithm to detect and characterize Neisseria meningitidis carriage isolates in the African meningitis belt
Source: PubMed Central journal article supplement (PMC6281270; doi:10.1371/journal.pone.0206453), 2018-12-05
Supplement: pone.0206453.s001.pdf [file pone.0206453.s001.pdf]

A

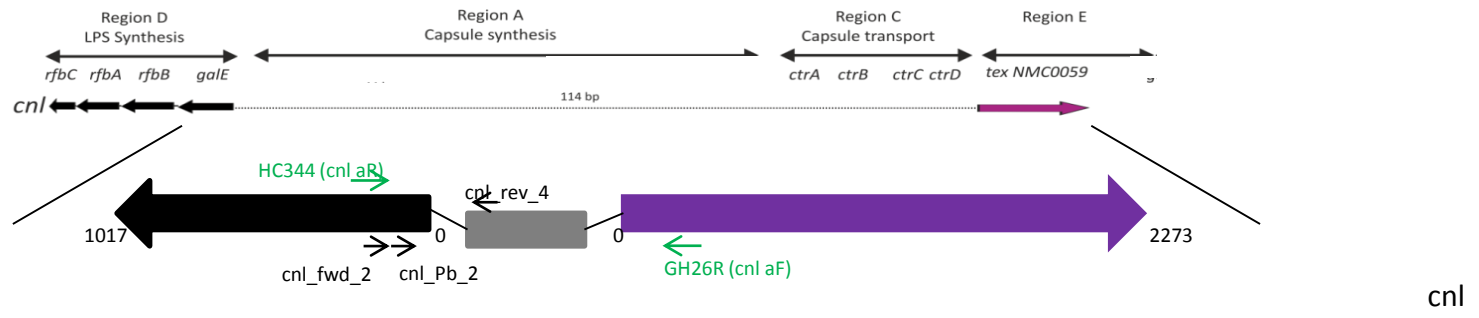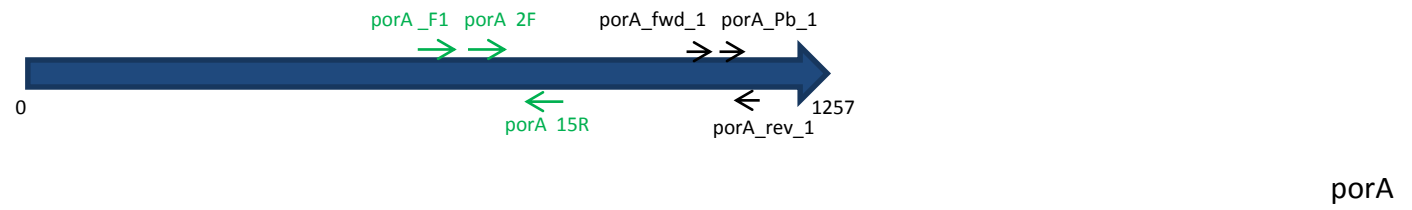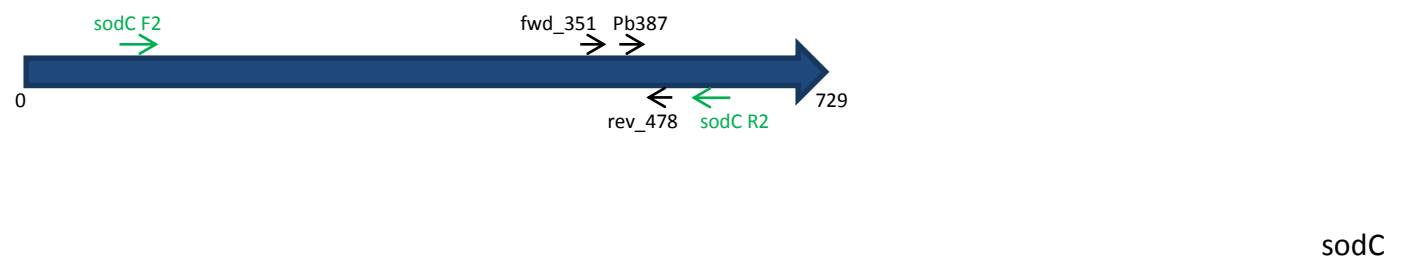

Figure S1 A

**B**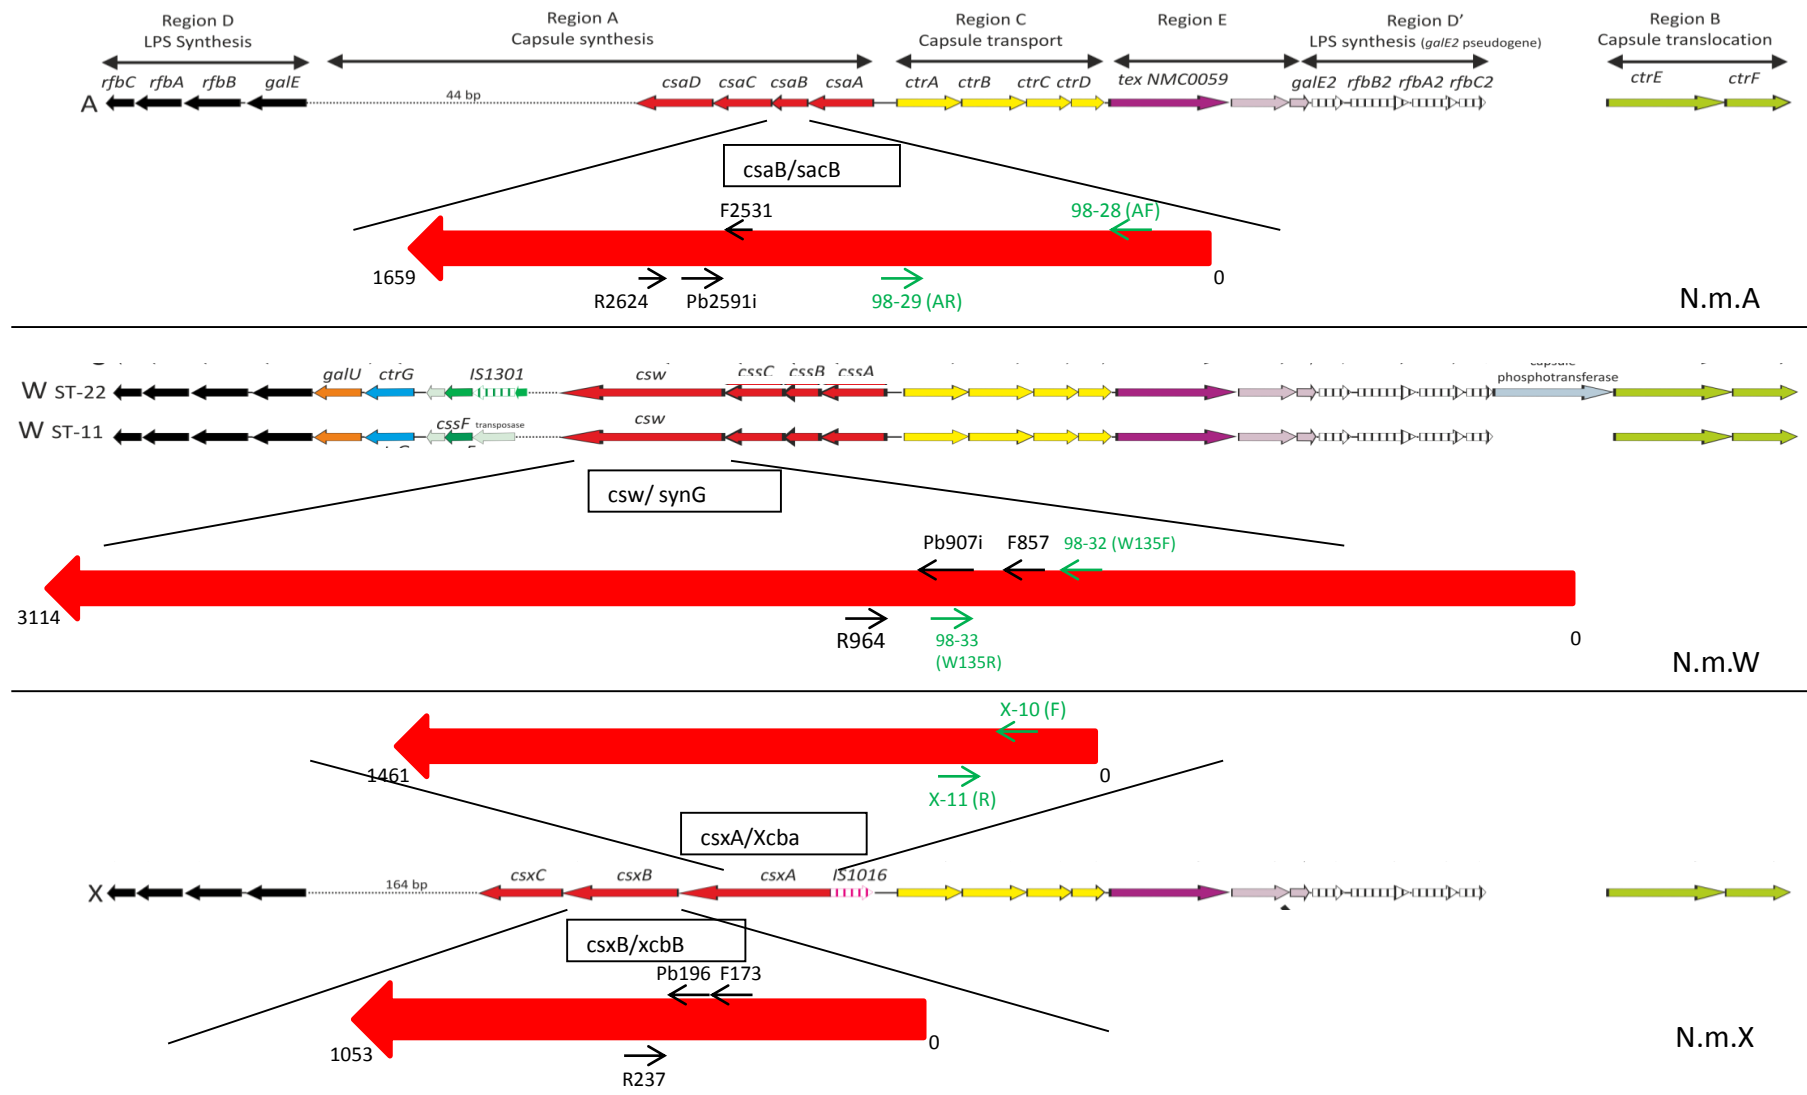**Figure S1 B**

C

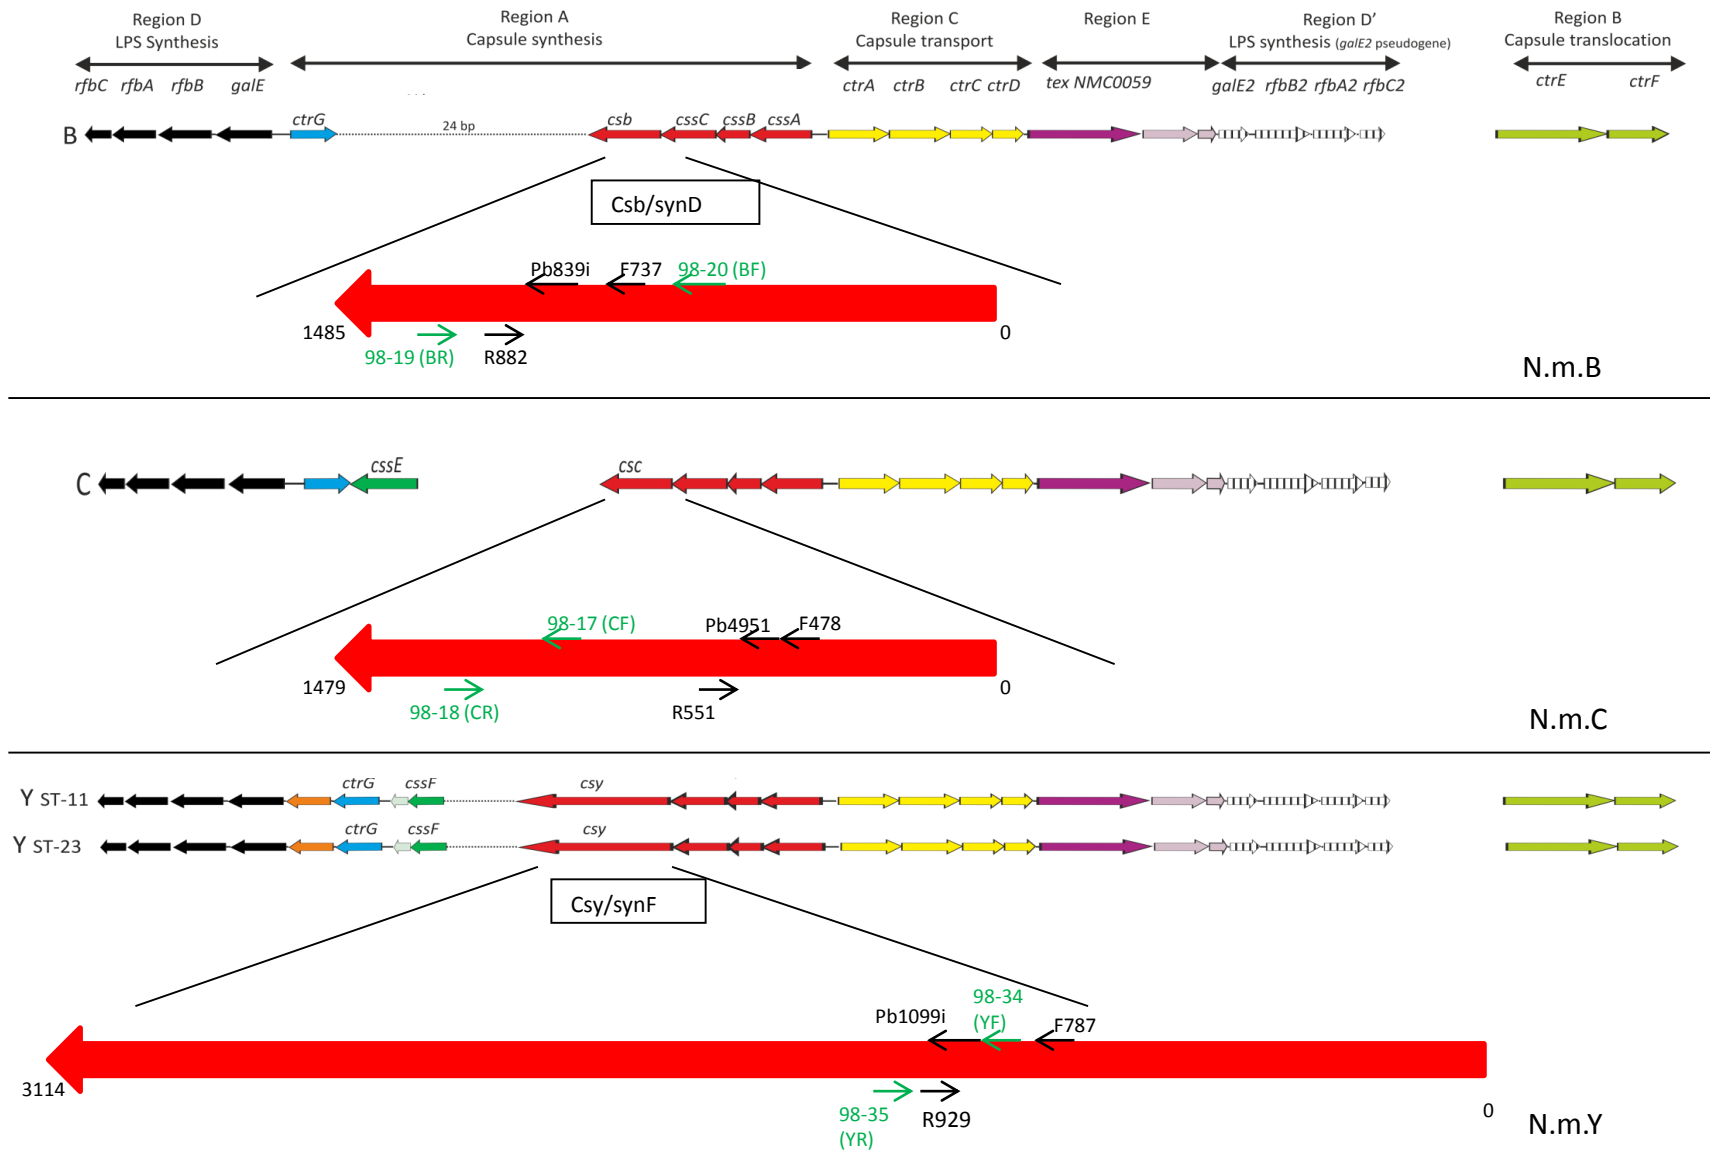

N.m.B

N.m.C

N.m.Y

Figure S1 C

**D**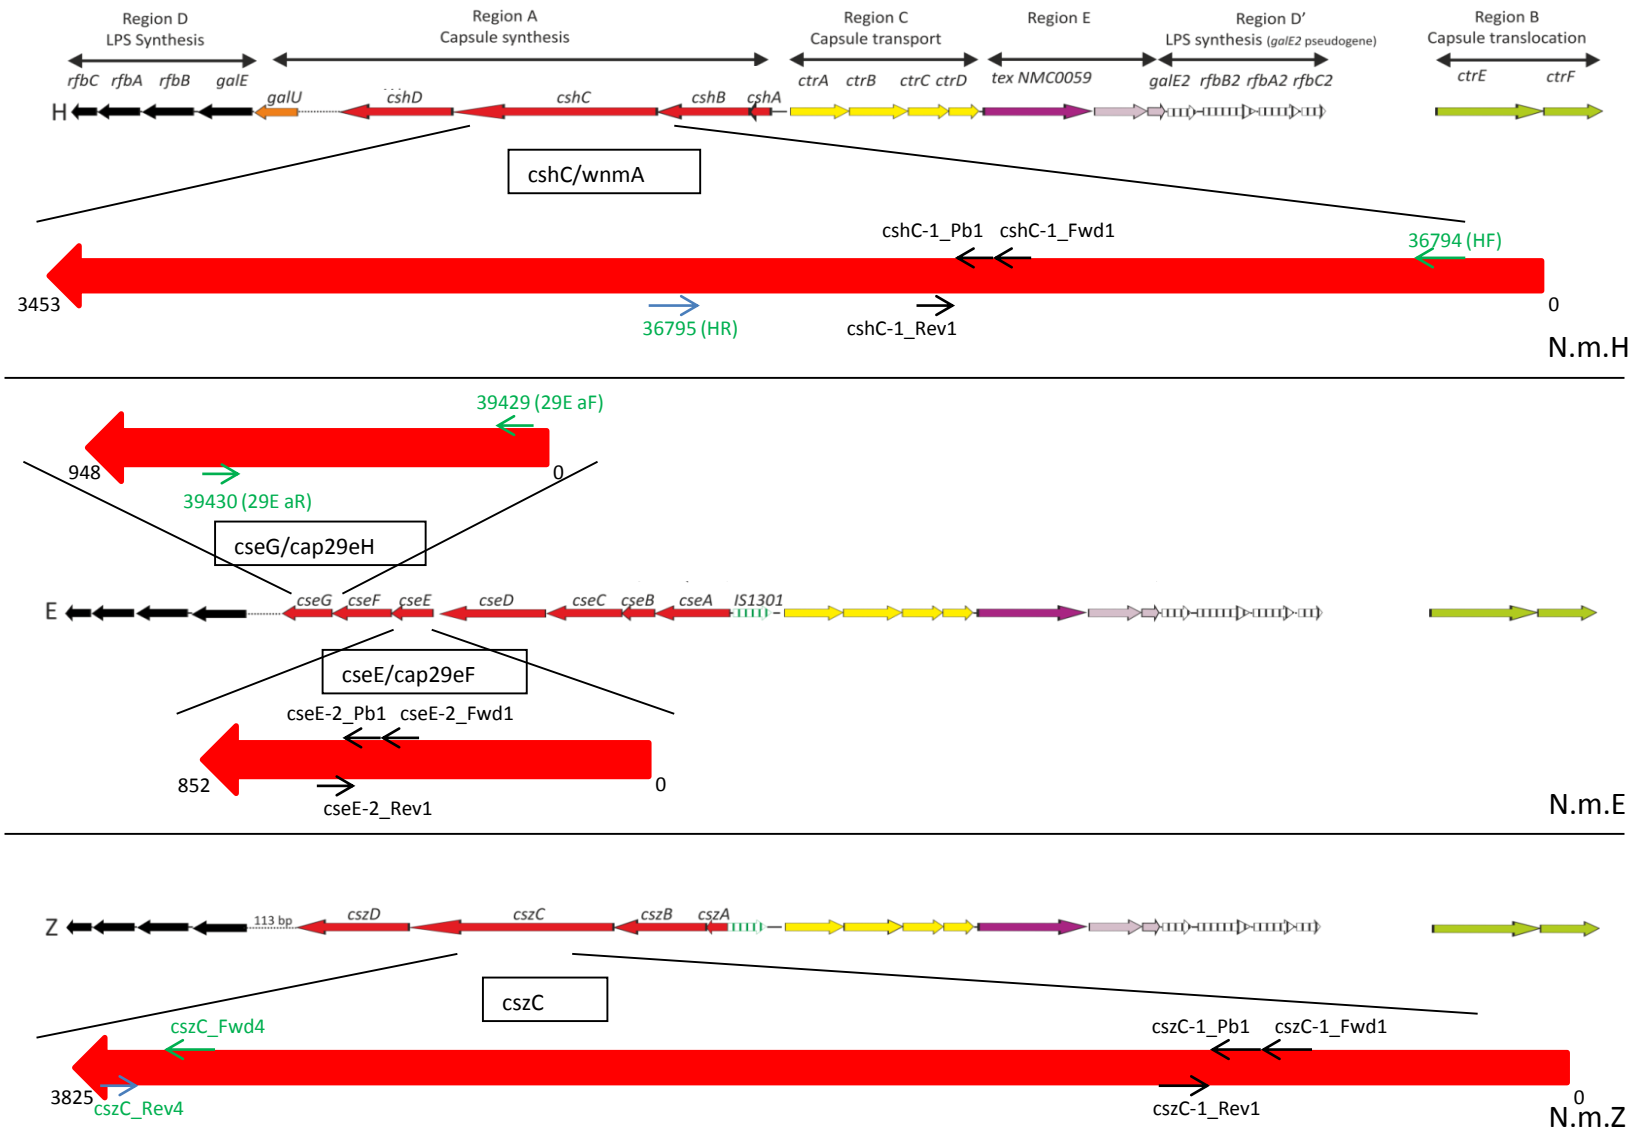**Figure S1 D**
