# Supplementary material for: Development of a PCR algorithm to detect and characterize Neisseria meningitidis carriage isolates in the African meningitis belt
Source: PLoS One. 2018 Dec 5;13(12):e0206453. doi: 10.1371/journal.pone.0206453 (PMC6281270; doi:10.1371/journal.pone.0206453)
Supplement: S2 Dataset — (XLSX) [file pone.0206453.s006.xlsx]

## Sheet: Ethiopia
		List of samples, Ethiopian site
				RT		RT		RT		RT	Multiplex SodC,Cnl,PorA			Multiplex SodC,Cnl,PorA
#	isolate ID	country	porA/cnl	porA Cnl	A,W,X	A,W,X	B,C,Y	B,C,Y	H,E,Z	H,E,Z	PorA	Cnl	SodC	PorA	Cnl	SodC	New PorA	Observation
1	13-00458-XS1-1	Ethiopia	porA	porA (15,827)	W	W(13,51)	-	-	-	-	13.642	45.334	14.661	+	-	+	+	Nm
2	13-00480-XS1-1	Ethiopia	porA; cnl	porA (13,368), Cnl (13,651)	-	-	-	-	-	-	12.056	13.406	12.586	+	+	+	+	Nm
3	13-00740-XS1-1	Ethiopia	porA; cnl	porA (15,782), Cnl (16,978)	-	-	-	-	-	-	13.789	15.824	14.652	+	+	+	+	Nm
4	13-00497-XS1-1	Ethiopia	-	-	-	-	-	-	-	-	42.005	37.914	39.353	-	-	-	-	Neg
5	13-01813-XS1-1	Ethiopia	porA	porA (14,579)	-	-	-	-	-	-	12.984	-	13.911	+	-	+	+	Nm
6	13-00450-XS1-1	Ethiopia	cnl	Cnl (19,854)	-	-	-	-	-	-	-	18.887	-	WB	+	-	WB	Disc
7	13-01862-XS1-1	Ethiopia	porA	porA (13,767)	W	W(11,58)	-	-	-	-	11.166	29.173	11.772	+	-	+	+	Nm
8	13-00495-XS1-1	Ethiopia	-	-	-	-	-	-	-	-	34.406	36.535	35.775	-	-	-	VWB	Disc
9	13-00775-XS1-1	Ethiopia	faint porA	-	-	-	-	-	-	-	32.605	35.524	34.705	-	-	-	-	Neg
10	13-00758-XS1-1	Ethiopia	porA	porA (14,569)	-	-	Y	Y (14.24)	-	-	12.167	-	13.736	+	-	+	+	Nm
11	13-00443-XS1-1	Ethiopia	porA; cnl	porA (14,143), Cnl (21,479)	-	-	-	-	-	-	11.864	21.937	12.292	+	+	+	+	Nm
12	13-00410-XS1-1	Ethiopia	porA; cnl	Cnl (14,845)	-	-	-	-	-	-	15.932	13.508	12.089	+	+	+	+	Nm
13	13-00591-XS1-1	Ethiopia	porA; cnl	Cnl (16,099)	-	-	-	-	-	-	15.94	13.764	12.651	+	+	+	+	Nm
14	13-00643-XS1-1	Ethiopia	porA	porA (13,765)	-	-	B	B (10.56)	-	-	11.639	49.191	11.956	+	-	+	+	Nm
15	13-00714-XS1-1	Ethiopia	porA	porA (17,629)	X	X(13,24)	-	-	-	-	15.215	39.37	20.436	+	-	+	+	Nm
16	13-01832-XS1-1	Ethiopia	porA;cnl	porA (15,201), Cnl (16,322)	-	-	-	-	-	-	12.584	14.551	13.328	+	+	+	+	Nm
17	13-01861-XS1-1	Ethiopia	cnl	Cnl (21,571)	-	-	-	-	-	-	21.653	19.832	19.534	-	WB	-	-	Disc
18	13-01868-XS1-1	Ethiopia	porA	porA (16,264)	-	X(13,42)	-	-	-	-	12.686	-	16.161	+	-	-	+	Disc
19	13-01810-XS1-1	Ethiopia	porA;cnl	Cnl (16,200)	-	-	-	-	-	-	14.193	14.205	14.899	WB	+	+	+	Nm
20	13-00209-XS1-1	Ethiopia	porA;cnl	porA (16,651), Cnl (17,714)	-	-	-	-	-	-	13.807	16.955	17.776	+	+	+	+	Nm
21	13-00682-XS1-1	Ethiopia	porA	porA (15,435)	-	-	-	-	-	-	11.593	-	14.166	+	-	+	+	Nm
22	13-00518-XS1-1	Ethiopia	porA;cnl	Cnl (14,766)	-	-	-	-	-	-	12.257	11.825	12.693	WB	+	+	+	Nm
23	13-00681-XS1-1	Ethiopia	porA	porA (13,269)	-	-	Y	Y (12.14)	-	-	11.012	44.342	12.736	+	-	+	+	Nm
24	13-00297-XS1-1	Ethiopia	porA;cnl	porA (13,338), Cnl (13,679)	-	-	-	-	-	-	11.004	11.552	12.524	+	+	+	+	Nm
25	13-00238-XS1-1	Ethiopia	cnl	Cnl (16,227)	-	-	-	-	-	-	-	13.403	-	WB	+	-	-	Disc
26	13-00236-XS1-1	Ethiopia	porA	porA (15,084)	-	-	Y	Y (12.85)	-	-	11.473	-	13.956	+	-	+	+	Nm
27	13-00596-XS1-1	Ethiopia	porA;cnl	Cnl (16,784)	-	-	-	-	-	-	13.725	13.581	15.133	WB	+	+	+	Nm
28	13-00314-XS1-1	Ethiopia	porA;cnl	porA (16,836), Cnl (17,801)	-	-	-	-	-	-	11.88	14.79	14.781	+	+	+	+	Nm
29	13-00320-XS1-1	Ethiopia	porA;cnl	porA (15,414), Cnl (16,507)	-	-	-	-	-	-	11.636	13.543	14.283	+	+	+	+	Nm
30	13-00220-XS1-1	Ethiopia	porA;cnl	porA (13,998), Cnl (14,258)	-	-	-	-	-	-	11.387	12.265	13.666	+	+	+	VWB	Disc
31	13-00068-XS1-1	Ethiopia	porA	porA (14,543)	-	-	-	Y(13.81)	-	-	11.636	-	14.661	+	-	+	+	Nm
32	13-01782-XS1-1	Ethiopia	porA	porA (23,175)	W	W(25,04)	-	-	-	-	21.533	-	27.837	+	-	WB	WB	Disc
33	13-00589-XS1-1	Ethiopia	porA;cnl	porA (17,370), Cnl (23,187)	-	-	-	-	-	-	15.029	22.72	18.535	+	+	+	+	Nm
34	13-00564-XS1-1	Ethiopia	-	porA (16,641)	-	-	-	-	-	-	11.951	-	15.535	-	-	-	-	Disc
35	13-00529-XS1-1	Ethiopia	cnl	Cnl (15,229)	-	-	-	-	-	-	-	12.585	-	-	+	-	-	Neg
36	13-00597-XS1-1	Ethiopia	cnl	Cnl (18,102)	-	-	-	-	-	-	-	15.69	-	-	+	-	-	Neg
37	13-00441-XS1-1	Ethiopia	porA	porA (16,080)	-	-	C	C (14.81)	-	-	11.69	-	14.487	+	-	+	+	Nm
38	13-00421-XS1-1	Ethiopia	porA;cnl	Cnl (14,559)	-	-	-	-	-	-	12.244	11.967	12.697	-	+	+	+	Nm
39	13-01809-XS1-1	Ethiopia	porA;cnl	porA (15,797), Cnl (17,178)	-	-	-	-	H(FB)	-	12.274	14.535	15.327	+	+	+	+	Nm
40	13-00523-XS1-1	Ethiopia	porA;cnl	Cnl (14,430)	-	-	-	-	-	-	12.257	11.966	12.832	-	+	+	+	Nm
41	13-00693-XS1-1	Ethiopia	porA;cnl	-	-	-	-	-	-	-	21.88	30.891	26.018	+	WB	+	+	Disc
42	13-01726-XS1-1	Ethiopia	porA;cnl	porA (14,467), Cnl (15,819)	-	-	-	-	-	-	12.885	15.452	16.236	+	+	+	+	Nm
43	13-01806-XS1-1	Ethiopia	porA;cnl	Cnl (15,766)	-	-	-	-	-	-	14.15	13.482	14.962	+	+	+	+	Nm
44	13-00666-XS1-1	Ethiopia	porA	porA (15,402)	-	-	C	C (13.75)	-	-	11.472	-	13.868	+	-	+	+	Nm
45	13-00541-XS1-1	Ethiopia	porA;cnl	porA (15,569), Cnl (18,045)	-	-	-	-	H(FB)	-	11.759	14.485	15.946	+	+	+	+	Nm
46	13-00570-XS1-1	Ethiopia	porA;cnl	porA (14,453), Cnl (14,284)	-	-	-	-	-	-	11.747	12.83	14.269	+	+	+	+	Nm
47	13-00524-XS1-1	Ethiopia	cnl	Cnl (18,014)	-	-	-	-	-	-	-	15.524	-	-	+	-	-	Neg
		WB	Weak band
		VWB	Very weak band
		Disc= Discordant results between qPCR and/or gel-based or gene
