# Supplementary material for: Development of a PCR algorithm to detect and characterize Neisseria meningitidis carriage isolates in the African meningitis belt
Source: PLoS One. 2018 Dec 5;13(12):e0206453. doi: 10.1371/journal.pone.0206453 (PMC6281270; doi:10.1371/journal.pone.0206453)
Supplement: S4 Dataset — (XLSX) [file pone.0206453.s008.xlsx]

## Sheet: GGT positif ONPG negatif and Tr
List of samples, Malian site						GGT +, ONPG + and Tributyrine -					Gel based																Real Time
						Oxford Data					february 2012												2012-11-23	2012-11-21	2012-11-22	19-20 nov	16/08/12	24/01/2013	95--> 1min	95-->10min			14-01-13			Multiplex SodC,Cnl,PorA			Monoplex
isolate ID	id Oxford	country	siteid	personid	surveycode	rplF	genospecies	genogroup	awxy_pcr	sample_status	porA	A,W135,X	B, C, Y	A	X	Y	H	29E	C	B	Z	ctrA	W135	porA	cnl	porA/cnl	A,W135,X (Ct)	A,W,X	W (Ct)	W (Ct)	A	X	PorA (Ct)	Cnl (Ct)	PorA, Cnl	PorA	Cnl	SodC	SodC	SodC (CDC)	Y	B	C	Y, B, C	H	E	Z	Z, E,H	Z
01-00004-XS1-1	10295	Mali	1	4	XS1	2	Neisseria meningitidis		Y		porA	-	Y	-	-	+		-	-	-	-	+	-	porA	-	porA	-	-	-	-	-	-	11.958	-	porA (11,979)	12.162	46.556	14.685	13.322	15, 261	11.721	-	-	Y(11,17)	-	-	-	-	-
01-00094-XS1-1	10320	Mali	1	94	XS1	67	Neisseria meningitidis		neg		porA	-	-	-	-	-		-	-	-	-	+	-	porA	cnl	porA;cnl	-	-	-	-	-	-	12.446	15.197	porA (12,333), Cnl (13,906)	11.976	14.38	13.286	12.698	14.397	-	-	-	-	-	-	-	-	-
01-00104-XS1-1	10323	Mali	1	104	XS1	3	Neisseria meningitidis		neg		porA	-	B	-	-	-		-	-	+	-	+	-	porA	-	porA	-	-	-	-	-	-	12.916	-	porA (11,953)	11.691	-	13.13	12.368	14.059	-	13.288	-	B(13,33	-	-	-	-	-
01-00119-XS1-1	10325	Mali	1	119	XS1	62	Neisseria sp.		neg		porA	-	-	-	-	-		-	-	-	-	-	-	faint porA	-	faint porA	-	-	-	-	-	-	-	20.456	Cnl(18,588)	27.376	18.557	14.454	13.198	14.202	-	-	-	-	-	-	-	-	-
01-00433-XS1-1	10341	Mali	1	433	XS1	0	Tested, no result		neg		-	-	-	-	-	-		-	-	-	-	+	-	-	-	-	-	-	-	-	-	-	-	21.79	Cnl(20,52)	37.723	19.809	14.083	12.67	14.049	-	-	-	-	-	-	-	-	-
01-00517-XS1-1	10343	Mali	1	517	XS1	0	Tested, no result		neg		-	-	-	-	-	-		-	-	-	-	-	-	-	-	-	-	-	-	-	-	-	-	-	-	33.266	38.912	35.77	35.239	34.709	-	-	-	-	-	-	-	-	-
01-00596-XS1-1	10344	Mali	1	596	XS1	2	Neisseria meningitidis		W-135		porA	W135	-	-	-	-		-	-	-	-	+	W135	porA	-	porA	W135 (18,446)	W (14,224)	28.668	13.073	-	-	12.569	-	porA (12,466)	11.721	-	13.185	12.577	13.61	-	-	-	-	-	-	-	-	-
01-00606-XS1-1	10345	Mali	1	606	XS1	1	Neisseria meningitidis		neg		porA	-	-	-	-	-		-	-	-	-	-	-	porA	cnl	porA;cnl	-	-	-	-	-	-	17.782	14.733	porA(17,037), Cnl (13,315)	14.177	13.712	13.313	12.628	12.863	-	-	-	-	-	-	-	-	-
01-00611-XS1-1	10346	Mali	1	611	XS1	1	Neisseria meningitidis		neg		porA	-	-	-	-	-		-	-	-	-	+	-	porA	cnl	porA;cnl	-	-	-	-	-	-	17.354	14.759	porA(16,891),Cnl(13,482)	13.928	14.209	13.772	13.003	14.777	-	-	-	-	-	-	-	-	-
02-01017-XS1-1	10360	Mali	2	1017	XS1	0	Tested, no result		W-135		porA	W135	-	-	-	-		-	-	-	-	+	W135	porA	-	porA	W135 (17,359)	W(13,826)	26.741	13.116	-	-	12.51	-	porA(13,094)	11.707	47.941	13.735	12.854	15.44	-	-	-	-	-	-	-	-	-
02-01030-XS1-1	10361	Mali	2	1030	XS1	0	Tested, no result		neg	poor quality DNA	porA	-	-	-	-	-		-	-	-	-	+	-	-	-	-	-	-	-	-	-	-	-	20.472	Cnl (18,944)	41.302	18.461	14.034	12.63	13.997	-	-	-	-	-	-	-	-	-
02-01070-XS1-1	10362	Mali	2	1070	XS1	0	Tested, no result		neg	poor quality DNA	-	-	-	-	-	-		-	-	-	-	+	-	-	-	-	-	-	-	-	-	-	-	19.855	Cnl (18,66)	40.016	18.289	13.283	11.895	13.474	-	-	-	-	-	-	-	-	-
02-01105-XS1-1	10363	Mali	2	1105	XS1	62	Neisseria sp.		neg		-	-	-	-	-	-		-	-	-	-	-	-	-	cnl	cnl	-	-	-	-	-	-	-	14.35	Cnl (14,692)	-	13.889	-	30.805	29.304	-	-	-	-	-	-	-	-	-
02-01177-XS1-1	10364	Mali	2	1177	XS1	1	Neisseria meningitidis		neg		porA	-	-	-	-	-		-	-	-	-	-	-	porA	cnl	porA;cnl	-	-	-	-	-	-	16.829	14.374	porA(18,404), Cnl(12,706)	15.148	13.861	13.015	12.199	13.532	-	-	-	-	-	-	-	-	-
02-01266-XS1-1	10365	Mali	2	1266	XS1	2	Neisseria meningitidis		W-135		NA	NA	-	-	-	-		-	-	-	-	+	W135	porA	-	porA	W135 (15,832)	W (14,444)	28.098	13.777	-	-	13.254	-	porA(12,757)	11.98	-	14.107	13.029	14.455	-	-	-	-	-	-	-	-	-
02-01281-XS1-1	10366	Mali	2	1281	XS1	1	Neisseria meningitidis		neg		porA	-	-	-	-	-		-	-	-	-	-	-	pora	cnl	porA;cnl	-	-	-	-	-	-	17.793	14.596	porA(17,122), Cnl(13,211)	14.19	13.962	13.589	12.781	14.049	-	-	-	-	-	-	-	-	-
02-01282-XS1-1	10367	Mali	2	1282	XS1	2	Neisseria meningitidis		neg		porA	-	-	-	-	-		-	-	-	-	+	-	porA	-	porA	-	-	-	-	-	-	11.865	-	porA(11,857)	11.595	-	13.117	12.572	13.745	-	-	-	-	-	-	-	-	-
02-01287-XS1-1	10368	Mali	2	1287	XS1	62	Neisseria sp.		neg		-	-	-	-	-	-		-	-	-	-	-	-	-	-	-	-	-	-	-	-	-	-	20.347	Cnl (18,499)	-	18.338	13.78	12.201	13.266	-	-	-	-	-	-	-	-	-
02-01356-XS1-1	10369	Mali	2	1356	XS1	2	Neisseria meningitidis		Y		porA	-	Y	-	-	+		-	-	-	-	+	-	porA	-	porA	-	-	-	-	-	-	13.526	-	porA (12,497)	11.679	-	13.645	12.645	13.69	11.916	-	-	Y(10,937)	-	-	-	-	-
02-01666-XS1-1	10370	Mali	2	1666	XS1	43	Neisseria subflava		neg		-	-	-	-	-	-		-	-	-	-	-	-	-	-	faint cnl	-	-	-	-	-	-	-	-	-	37.754	-	40.446	34.569	38.001	-	-	-	-	-	-	-	-	-
02-01674-XS1-1	12726	Mali	2	1674	XS1	0	Tested, no result			poor quality DNA	-	-	-	-	-	-		-	-	-	-	-	-	-	cnl	cnl	-	-	-	-	-	-	-	14.23	Cnl (13,204)	-	14.017	-	28.136	32.642	-	-	-	-	-	-	-	-	-
02-01703-XS1-1	10372	Mali	2	1703	XS1	2	Neisseria meningitidis		W-135		porA	W135	-	-	-	-		-	-	-	-	+	W135	porA	-	porA	-	W (14,350)	26.774	13.801	-	-	13.238	-	porA (13,319)	11.932	-	13.71	12.93	13.424	-	-	-	-	-	-	-	-	-
02-01717-XS1-1	10373	Mali	2	1717	XS1	0	Tested, no result		neg		-	-	-	-	-	-		-	-	-	-	-	-	-	-	-	-	-	-	-	-	-	-	22.12	,Cnl(19,642)	27.322	22.494	15.998	13.901	14.02	-	-	-	-	-	-	-	-	-
02-01818-XS1-1	10374	Mali	2	1818	XS1	2	Neisseria meningitidis		W-135		porA	W135	-	-	-	-		-	-	-	-	+	W135	porA	-	porA	W135 (17,519)	W (13,944)	28.198	13.883	-	-	13.591	-	porA(12,63)	11.547	-	13.192	12.391	12.85	-	-	-	-	-	-	-	-	-
02-01851-XS1-1	10375	Mali	2	1851	XS1	0	Tested, no result		neg		porA	Y	Y	-	-	+		-	-	-	-	+	-	porA	-	porA	-	-	-	-	-	-	13.586	-	porA (13,085)	12.241	-	14.969	13.72	15.294	13.393	-	-	Y(12,28)	-	-	-	-	-
02-02037-XS1-1	10377	Mali	2	2037	XS1	0	Tested, no result		neg		porA	-	-	-	-	-		-	-	-	-	-	-	porA	cnl	porA;cnl	-	-	-	-	-	-	17.206	14.267	porA (16,721), Cnl (12,806)	14.522	13.822	13.718	12.517	14.53	-	-	-	-	-	-	-	-	-
02-02316-XS1-1	10378	Mali	2	2316	XS1	0	Tested, no result		neg		porA	-	-	-	-	-		-	-	-	-	-	-	porA	cnl	porA;cnl	-	-	-	-	-	-	17.598	14.64	porA(17,462),Cnl (13,418)	14.705	14.339	14.114	13.143	14.527	-	-	-	-	-	-	-	-	-
02-02460-XS1-1	10379	Mali	2	2460	XS1	43	Neisseria subflava		neg		-	-	-	-	-	-		-	-	-	-	-	-	-	-	faint cnl	-	-	-	-	-	-	-	-	-	-	-	-	39.272	37.781	-	-	-	-	-	-	-	-	-
02-02535-XS1-1	10380	Mali	2	2535	XS1	1	Neisseria meningitidis		neg		porA	-	-	-	-	-		-	-	-	-	-	-	porA	cnl	porA;cnl	-	-	-	-	-	-	17.583	14.265	porA (18,108), Cnl (13,215)	14.923	13.77	13.106	12.324	13.436	-	-	-	-	-	-	-	-	-
02-02557-XS1-1	10381	Mali	2	2557	XS1	0	Tested, no result		neg		-	-	-	-	-	-		-	-	-	-	-	-	-	-	-	-	-	-	-	-	-	-	20.748	Cnl (19,757)	-	19.22	14.362	12.936	14.251	-	-	-	-	-	-	-	-	-
02-02889-XS1-1	10382	Mali	2	2889	XS1	0	Tested, no result		neg		-	-	-	-	-	-		-	-	-	-	-	-	-	cnl	cnl	-	-	-	-	-	-	-	20.883	Cnl (18,835)	-	19.223	14.202	12.628	13.611	-	-	-	-	-	-	-	-	-
02-02891-XS1-1	10383	Mali	2	2891	XS1	0	Tested, no result		neg		-	-	-	-	-	-		-	-	-	-	-	-	-	-	-	-	-	-	-	-	-	-	21.168	Cnl (18,987)	-	18.865	14.939	13.238	14.15	-	-	-	-	-	-	-	-	-
02-03024-XS1-1	10384	Mali	2	3024	XS1	2	Neisseria meningitidis		W-135		porA	W135	-	-	-	-		-	-	-		+	W135	porA	-	porA	W135 (17,59)	W (15,569)	27.513	15.231	-	-	14.793	-	porA(14,219)	13.527	49.077	15.943	14.148	15.478	-	-	-	-	-	-	-	-	-
02-03095-XS1-1	10385	Mali	2	3095	XS1	2	Neisseria meningitidis		Y		porA	-	Y	-	-	+		-	-	-		+	-	porA	-	porA	-	-	-	-	-	-	13.409	-	porA (12,394)	12.123	-	14.438	13.144	14.509	12.462	-	-	Y(11,62	-	-	-	-	-
01-03581-XS1-1	12594	Mali	1	3581	XS1	62	Neisseria sp.				-	-	-	-	-	-		-	-	-		-	-	-	-	-	-	-	-	-	-	-	-	20.265	cnl (18,795)	-	19.211	13.485	12.491	13.453	-	-	-	-	-	-	-	-	-
01-03638-XS1-1	10349	Mali	1	3638	XS1	62	Neisseria sp.		neg		-	-	-	-	-	-		-	-	-		-	-	-	-	-	-	-	-	-	-	-	-	20.961	Cnl (19,143)	-	18.953	14.592	12.733	14.518	-	-	-	-	-	-	-	-	-
01-03843-XS1-1	12584	Mali	1	3843	XS1	43	Neisseria subflava				-	-	-	-	-	-		-	-	-		-	-	-	-	faint cnl	-	-	-	-	-	-	-	-	-	37.624	-	40.257	35.125	31.937	-	-	-	-	-	-	-	-	-
01-03957-XS1-1	10351	Mali	1	3957	XS1	62	Neisseria sp.		neg		-	-	-	-	-	-		-	-	-		-	-	-	-	-	-	-	-	-	-	-	-	20.412	Cnl (19,744)	39.867	19.199	13.722	12.536	14.584	-	-	-	-	-	-	-	-	-
01-07010-XS1-1	10352	Mali	1	7010	XS1	1	Neisseria meningitidis		neg		porA	-	-	-	-	-		-	-	-		-	-	porA	cnl	porA;cnl	-	-	-	-	-	-	18.832	14.89	porA(18,75), Cnl(13,31)	15.445	14.25	14.16	12.889	14.807	-	-	-	-	-	-	-	-	-
01-07021-XS1-1	10353	Mali	1	7021	XS1	1	Neisseria meningitidis		neg		porA	-	-	-	-	-		-	-	-		-	-	porA	cnl	porA;cnl	-	-	-	-	-	-	17.943	14.15	porA(17,702), Cnl(13,874)	15.452	14.25	14.248	13.113	15.305	-	-	-	-	-	-	-	-	-
01-07065-XS1-1	10354	Mali	1	7065	XS1	0	Tested, no result		neg		-	-	-	-	-	-		-	-	-		-	-	-	-	-	-	-	-	-	-	-	-	-	-	30.96	33.71	33.548	30.506	36.194	-	-	-	-	-	-	-	-	-
01-07108-XS1-1	10355	Mali	1	7108	XS1	1	Neisseria meningitidis		neg		NA	NA	-	-	-	-		-	-	-		-	-	porA	cnl	porA;cnl	-	-	-	-	-	-	17.759	14.136	porA (18,445), Cnl (13,708)	15.605	14.667	14.804	13.8	15.241	-	-	-	-	-	-	-	-	-
01-07436-XS1-1	10356	Mali	1	7436	XS1	62	Neisseria sp.		neg		-	-	-	-	-	-		-	-	-		-	-	-	-	-	-	-	-	-	-	-	-	20.373	Cnl(19,305)	-	19.426	15.083	12.984	14.112	-	-	-	-	-	-	-	-	-
01-07665-XS1-1	10357	Mali	1	7665	XS1	63	Neisseria polysaccharea		neg		-	-	-	-	-	-		-	-	-		-	-	-	cnl	cnl	-	-	-	-	-	-	-	13.756	Cnl (13,139)	-	13.646	-	31.124	32.573	-	-	-	-	-	-	-	-	-
02-07958-XS1-1			2	7958	XS1						-	-	-	-	-	-		-	-	-		-	-	-	-	-	-	-	-	-	-	-	-	20.652	Cnl (20,264)	33.284	19.715	15.152	13.405	14.403	-	-	-	-	-	-	-	-	-
			Added by Kanny to Uma's list
01-00502-XS1-1	10342	Mali	1	502	XS1	0	Tested, no result		neg		porA	-	-	-	-	-		-	-	-		-	-	porA	cnl	porA;cnl	-	-	-	-	-	-	14.85	16.354	porA(11,283), Cnl(14,059)	12.511	14.446	14.998	14.125	15.716	-	-	-	-	-	-	-	-	-
01-08170-HH1-1	10359	Mali	1	8170	HH1	1	Neisseria meningitidis		A		porA	A	-	A	-	-		-	-	-		+	-	porA	-	porA	A (19,953)	A (17,442)	-	-	A(16.191)	-	14.48	-	porA (11,83)	13.251	46.679	16.572	15	15.989	-	-	-	-	-	-	-	-	-
[truncated: 6 more columns]
