# Supplementary material for: Development of a PCR algorithm to detect and characterize Neisseria meningitidis carriage isolates in the African meningitis belt
Source: PLoS One. 2018 Dec 5;13(12):e0206453. doi: 10.1371/journal.pone.0206453 (PMC6281270; doi:10.1371/journal.pone.0206453)
Supplement: S5 Dataset — (XLSX) [file pone.0206453.s009.xlsx]

## Sheet: Niger
List of samples, Niger site
				RT		RT		RT		RT	Multiplex SodC,Cnl,PorA			Multiplex SodC,Cnl,PorA
#	isolate ID	country	porA/cnl	porA,cnl	A,W,X	A,W,X	B,C,Y	B,C,Y	H,E,Z	H,E,Z	PorA	Cnl	SodC	PorA	Cnl	SodC	New PorA	Observation
1	03-00050-XS1	Niger	cnl	Cnl (18,060)	-	-	-	-	-	-	-	18.054	-	-	+	-	WB	Disc
2	03-00050XS2	Niger	cnl	Cnl (17,794)	-	-	-	-	-	-	-	16.267	-	-	+	-	VWB	Disc
3	03-00101-XS2	Niger	cnl	Cnl (16,937)	-	-	-	-	-	-	-	16.282	-	-	+	-	VWB	Disc
4	03-00102-XS1	Niger	-	Cnl (15,882)	-	-	-	-	-	-	18.308	16.159	16.829	-	+	+	+	Nm
5	03-00102-XS2	Niger	cnl	Cnl (17,919)	-	-	-	-	-	-	-	14.835	-	-	+	-	WB	Disc
6	03-00112-XS1	Niger	cnl	Cnl (20,645)	-	-	-	-	-	-	-	19.038	-	-	+	-	WB	Disc
7	03-00112-XS2	Niger	cnl	Cnl (20,361)	-	-	-	-	-	-	-	17.546	-	-	+	-	WB	Disc
8	03-00207-XS2	Niger	cnl	Cnl (21,119)	-	-	-	-	-	-	-	18.989	-	-	+	-	WB	Disc
9	03-00224-XS1	Niger	cnl	Cnl (20,559)	-	-	-	-	-	-	-	20.149	-	-	+	-	-	Neg
10	03-00224-XS2	Niger	cnl	Cnl (19,852)	-	-	-	-	-	-	-	17.724	-	-	+	-	WB	Disc
11	03-00074	Niger	-	Cnl (15,070)	-	-	-	-	-	-	14.956	14.038	12.771	-	+	+	+	Disc
12	03-00101-XS1	Niger	-	Cnl(15,867)	-	-	-	-	-	-	16.98	15.084	15.325	-	+	+	+	Disc
13	03-00117	Niger	-	Cnl (14,974)	-	-	-	-	-	-	15.586	14.321	12.399	-	+	+	+	Disc
14	03-00153	Niger	-	Cnl(22,239)	-	-	-	-	-	-	23.529	22.99	22.408	-	+	+	+	Disc
15	03-00159	Niger	cnl	Cnl (18,086)	-	-	-	-	-	-	15.213	14.437	13.998	-	+	+	+	Disc
16	03-00184	Niger	cnl	Cnl (19,077)	-	-	-	-	-	-	18.72	18.961	18.655	-	+	+	+	Disc
17	03-00193	Niger	-	Cnl (15,677)	-	-	-	-	-	-	16.753	15.097	15.062	-	+	+	+	Disc
18	01-00200	Niger	-	Cnl (16,898)	-	-	-	-	-	-	16.04	15.001	14.703	-	-	-	+	Disc
19	03-00222	Niger	faint porA/cnl	Cnl(18,242)	-	-	-	-	-	-	15.599	15.974	16.136	-	+	+	+	Disc
20	03-00230	Niger	-	Cnl (15,588)	-	-	-	-	-	-	17.325	23.768	18.652	-	-	-	+	Disc
21	03-00246	Niger	cnl	Cnl (17,067)	-	-	-	-	-	-	15.554	14.857	14.461	-	+	+	+	Disc
22	03-00255	Niger	-	Cnl (15,779)	-	-	-	-	-	-	15.967	14.514	13.03	-	-	-	-	Disc
23	03-00271	Niger	cnl	Cnl (16,010)	-	-	-	-	-	-	15.223	14.305	14.099	-	+	+	+	Disc
24	03-00288	Niger	-	Cnl (17,502)	-	-	-	-	-	-	17.269	16.637	16.28	-	-	-	+	Disc
25	03-00309	Niger	cnl	Cnl (17,726)	-	-	-	-	-	-	16.977	16.767	16.987	-	+	+	+	Disc
26	03-00344	Niger	cnl	Cnl (20,983)	-	-	-	-	-	-	20.018	19.805	19.5	WB	+	+	+	Nm
27	03-00372	Niger	-	Cnl (15,169)	-	-	-	-	-	-	15.905	14.847	14.49	-	+	+	+	Disc
28	03-00381	Niger	cnl	Cnl (15,510)	faint W135	-	-	-	-	-	15.44	14.694	14.694	-	+	+	+	Disc
29	03-00404	Niger	-	Cnl (16,499)	-	-	-	-	-	-	16.268	15.229	15.271	-	-	-	-	Disc
30	03-00168	Niger	porA	porA(14,886)	W135	W(16,18)	-	-	-	-	12.839	45.649	14.642	+	-	+	+	Nm
31	03-00221	Niger	porA	porA (17,191)	W135	W(15,73)	-	-	-	-	14.46	48.24	16.56	+	-	+	+	Nm
32	03-00278	Niger	porA	porA (14,776)	W135	W(13,17)	-	-	-	-	12.018	-	13.657	+	-	+	+	Nm
33	03-00280	Niger	porA	porA (16,224)	W135	W(15,35)	-	-	-	-	13.784	37.131	15.842	+	-	+	+	Nm
34	03-00298	Niger	-	porA (15,547)	-	W(14,84)	-	-	-	-	13.837	48.157	16.284	WB	-	-	-	Disc
35	03-00414	Niger	porA	porA (12,967)	W135	W(11,92)	-	-	-	-	11.655	-	12.864	+	-	+	+	Nm
36	03-00420	Niger	porA	porA (16,627)	W135	W(19,55)	-	-	-	-	13.555	-	15.886	+	-	+	+	Nm
37	03-05356	Niger	porA	porA (15,453)	W135	W(13,43)	-	-	-	-	12.364	-	14.315	+	-	+	+	Nm
38	03-05373	Niger	porA	porA (17,996)	W135	W(18,29)	-	-	-	-	16.321	-	19.649	+	-	+	+	Nm
39	03-05417	Niger	porA	porA (15,550)	W135	W(13,47)	-	-	-	-	13.461	-	15.949	+	-	+	+	Nm
40	03-05536	Niger	porA	porA (14,338)	W135	W(12,34)	-	-	-	-	11.749	-	12.94	+	-	+	+	Nm
41	03-05685	Niger	cnl	porA (33,160)	-	-	-	-	-	-	15.442	15.035	14.949	WB	+	+	+	Nm
42	03-05713	Niger	porA	porA (16,164)	W135	W(14,37)	-	-	-	-	14.321	40.733	16.598	+	-	+	+	Nm
43	03-05962	Niger	-	porA (36,788)	-	-	-	-	-	-	33.414	39.192	35.378	-	-	-	WB	Neg
44	03-05988	Niger	-	porA (34,758)	-	-	-	-	-	-	31.384	34.982	33.517	-	-	-	WB	Neg
45	03-06078	Niger	-	porA (13,612)	-	W(12,53)	-	-	-	-	11.137	-	13.079	-	-	-	+	Disc
46	03-06270	Niger	porA	porA (15,732)	W135	W(14,80)	-	-	-	-	13.102	43.233	14.128	+	-	+	+	Nm
47	03-06273	Niger	porA	porA (20,259)	W135	W(22,93)	-	-	-	-	16.58	-	13.803	+	-	+	+	Nm
48	03-06287	Niger	porA	porA (18,154)	W135	W(17,02)	-	-	-	-	15	-	17.7	+	-	+	+	Nm
49	03-06353	Niger	porA	porA (15,194)	W135	W(20,48)	-	-	-	-	12.161	-	15.083	+	-	+	+	Nm
50	04-14782	Niger	-	porA (13,527)	-	-	-	-	-	-	11.859	-	12.575	+	-	-	-	Disc
WB	Weak band
VWB	Very weak band
Disc= Discordant results between qPCR and/or gel-based or gene
